# Supplementary material for: Effect of design parameters in nanocatalyst synthesis on pyrolysis for producing diesel-like fuel from waste lubricating oil
Source: Royal Society of Chemistry journal article supplement (doi:10.1039/d4nr01183j), 2024-01-01
Supplement: d4nr01183j1.pdf [file d4nr01183j1.pdf]

## Supporting Information

### Effect of Design Parameters in Nanocatalyst Synthesis on Pyrolysis for Producing Diesel-Like Fuel from Waste Lubricating Oil

Riny Yolandha Parapat<sup>1\*</sup>, Aji Tri Laksono<sup>1</sup>, Rizki Imam Fauzi<sup>1</sup>, Yuni Maulani<sup>1</sup>, Freddy Haryanto<sup>2</sup>, Alfian Noviyanto<sup>3</sup>, Michael Schwarze<sup>4</sup> and Reinhard Schomäcker<sup>4</sup>

<sup>1</sup> Chemical Engineering Department, Institut Teknologi Nasional Bandung, PHH. Mustopha 23, 40124 Bandung, Indonesia.

<sup>2</sup> Physics Department, Institut Teknologi Bandung, Ganesha 10, 40132, Bandung, Indonesia

<sup>3</sup> Nano Centre Indonesia. Utama. Kawasan Puspittek, Gedung 410 – Ruang B07, Serpong. Indonesia

<sup>4</sup> Department of Chemistry, Technische Universität Berlin, Straße des 17. Juni 124, 10623 Berlin, Germany

\* E-mail: [rinyyolandha@itenas.ac.id](mailto:rinyyolandha@itenas.ac.id)

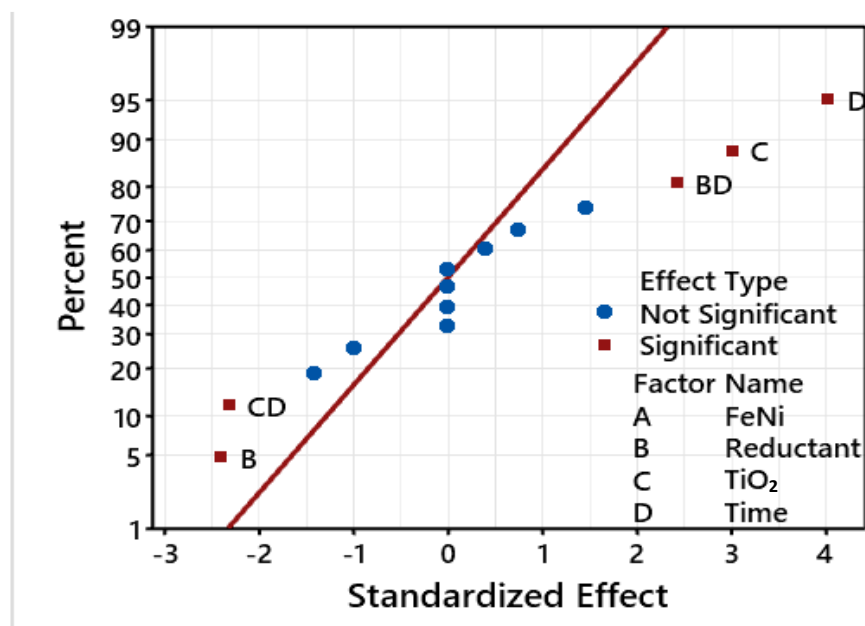

Fig. S1 Normal Plot of the Standardized Effects of Calorific Value (Cal/g)

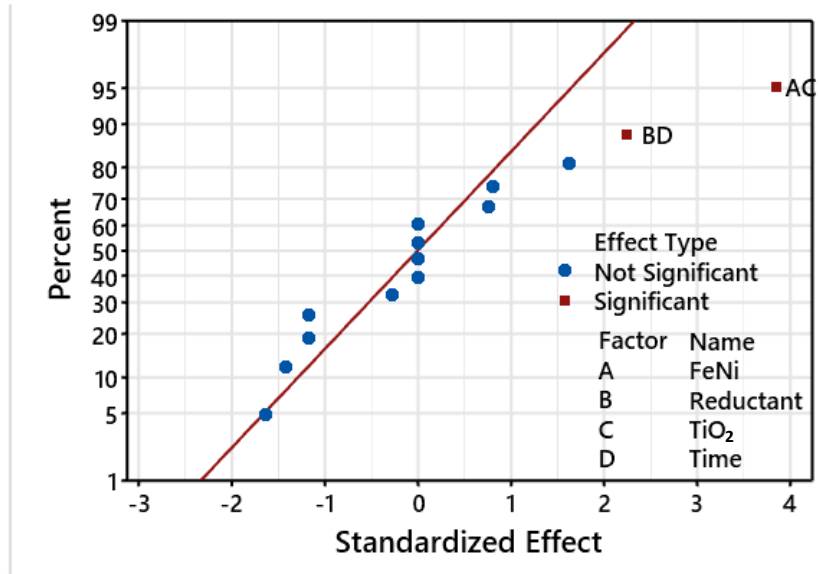

Fig. S2 Normal Plot of the Standardized Effects of Density (Kg/m<sup>3</sup>)

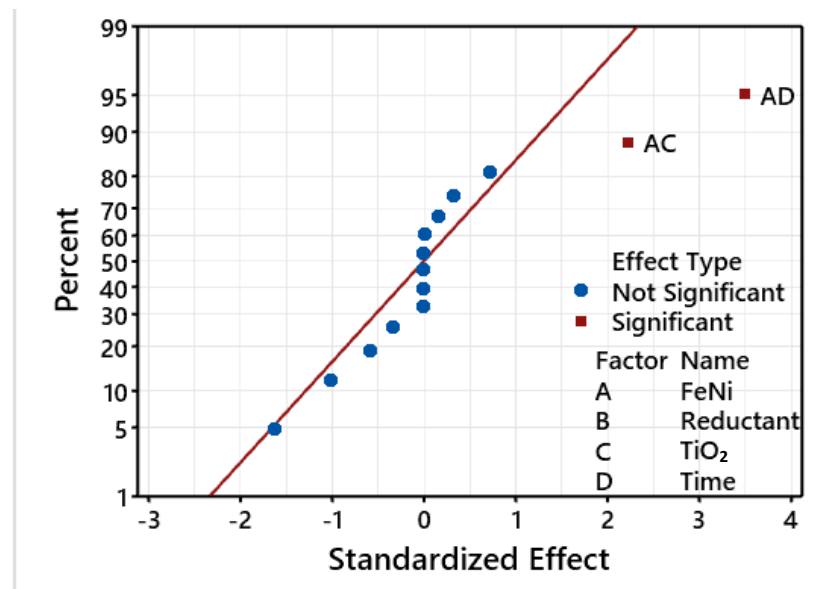

Fig. S3 Normal Plot of the Standardized Effects of Catalyst Yield

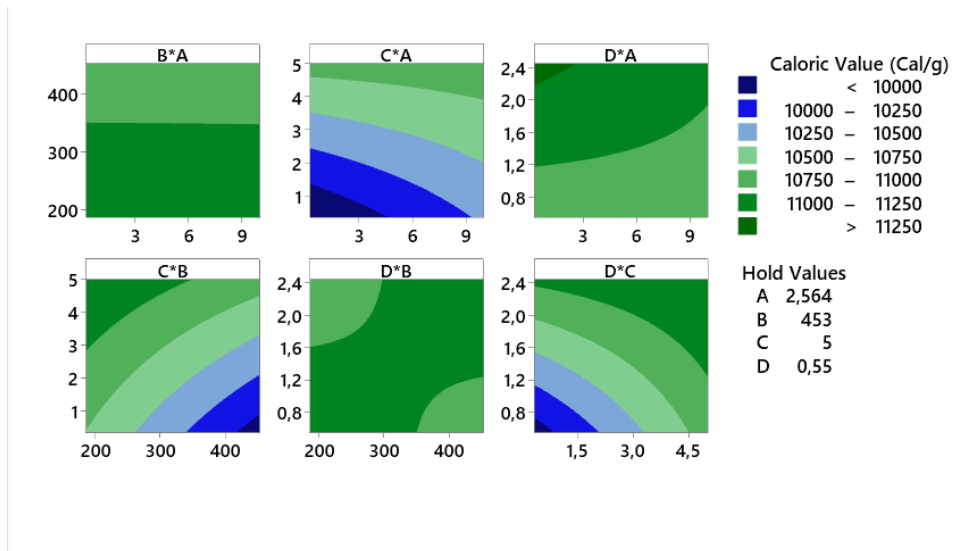

**Fig. S4** Contour Plots of Caloric Value (Cal/g)

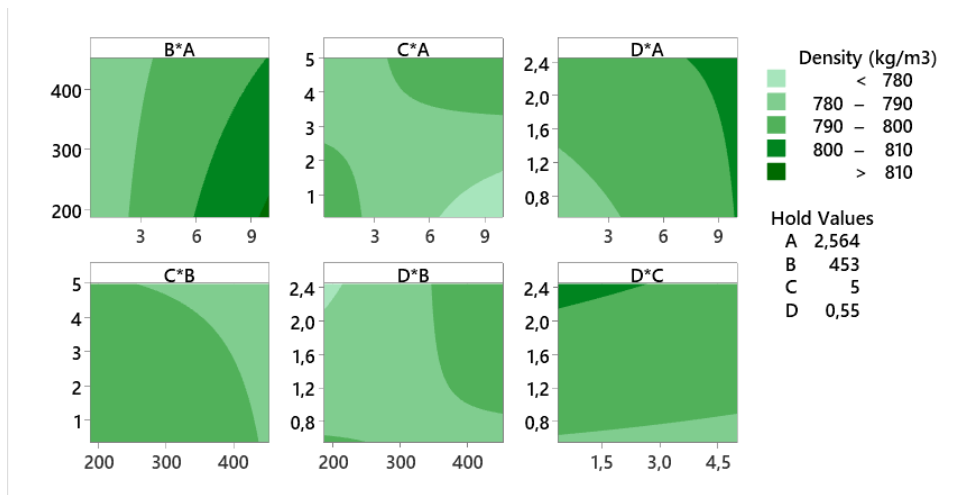

**Fig. S5** Contour Plots of Density (Kg/m<sup>3</sup>)

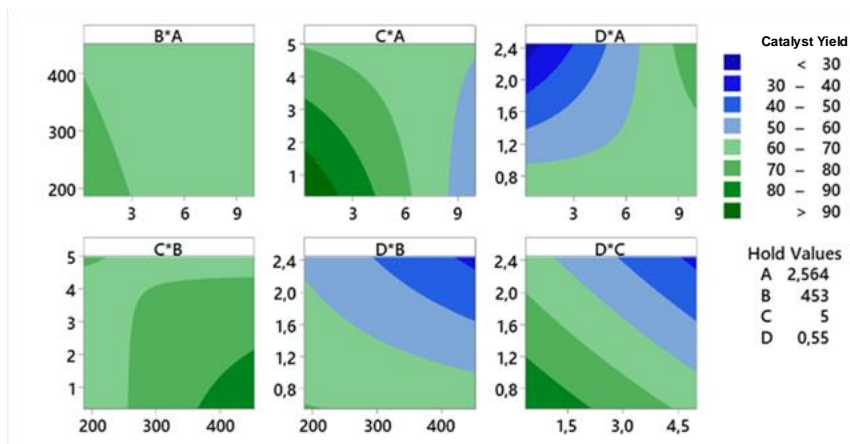

**Fig. S6** Contour Plots of Catalyst Yield

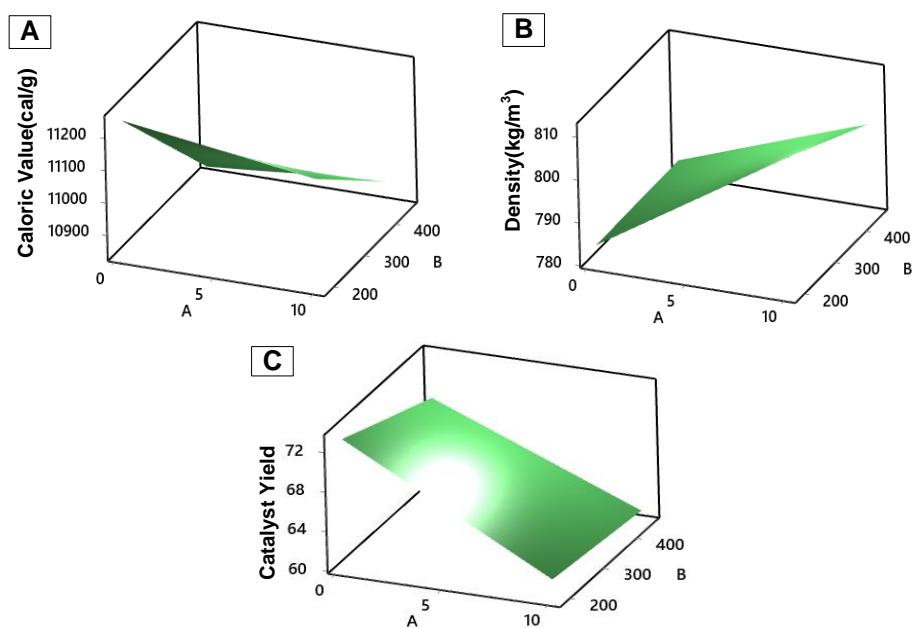

**Fig. S7** Surface Plots of a calorific value (cal/g), b density (kg/m<sup>3</sup>), and c catalyst yield

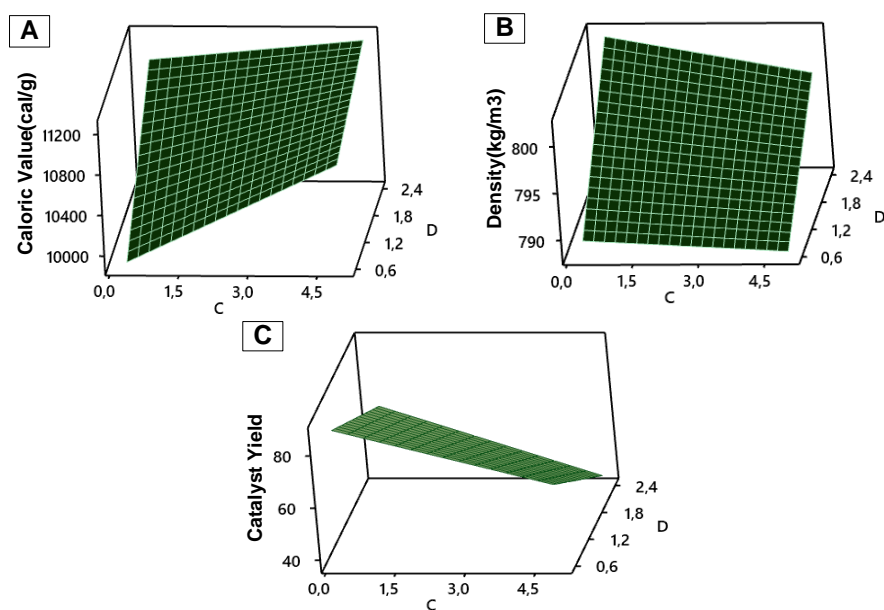

**Fig. S8** Surface Plots of (a) calorific value (cal/g), (b) density (kg/m<sup>3</sup>), and (c) catalyst yield

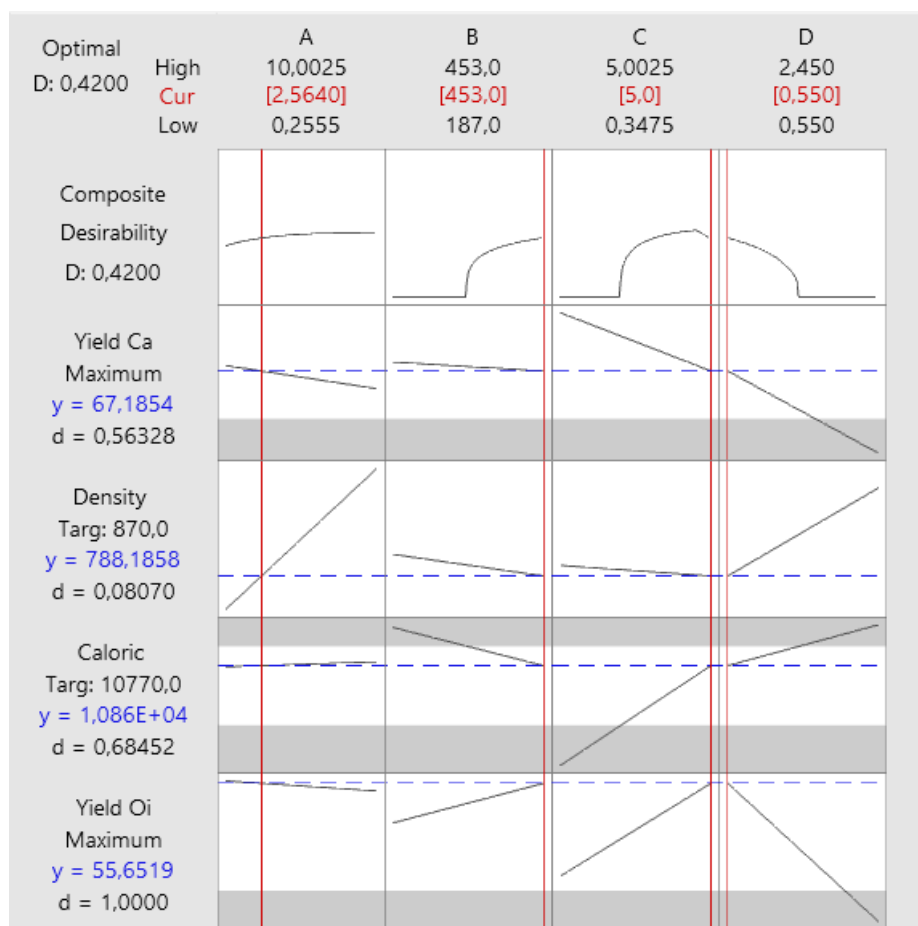

**Fig. S9** Response Optimization: Yield Catalyst; Density (kg/m<sup>3</sup>); Caloric Value (Cal/g); Oil Yield

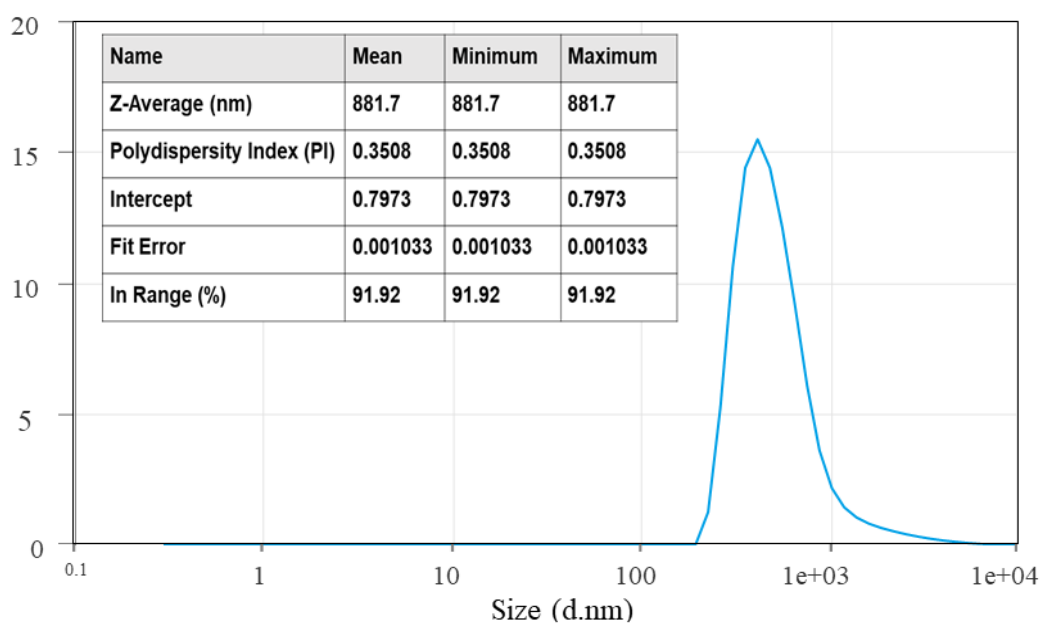

**Fig. S10** Particle size distribution of the TiO<sub>2</sub> support was measured using a Particle Size Analyzer (PSA)
